# Supplementary material
Source: Elsevier journal article supplement (https://www.arca.fiocruz.br/bitstream/handle/icict/60975/mmc1.pdf)
Supplement: mmc1 [file mmc1.pdf]

# THE LANCET

## Planetary Health

### Supplementary appendix

This translation in Portuguese was submitted by the authors and we reproduce it as supplied. It has not been peer reviewed. The Lancet Planetary Health's editorial processes have only been applied to the original in English, which should serve as reference for this manuscript.

Esta tradução em português foi submetida pelos autores e nós não fizemos quaisquer alterações. Esta versão não foi revista por pares. O processo editorial do The Lancet Planetary Health só foi aplicado à versão original em inglês, que deve servir como referência para este artigo.

Supplement to: Lowe R, Lee SA, O'Reilly KM, et al. Combined effects of hydrometeorological hazards and urbanisation on dengue risk in Brazil: a spatiotemporal modelling study. *Lancet Planet Health* 2021; 5: e209–19.

## **Efeitos combinados de eventos hidrometeorológicos extremos e urbanização no risco de dengue no Brasil: um estudo de modelagem espaço-temporal**

### **Resumo**

**Contexto:** Os padrões de temperatura e precipitação são reconhecidos por influenciar a sazonalidade da transmissão da dengue. No entanto, o impacto de eventos climáticos extremos (seca ou chuvas intensas) ainda é pouco compreendido em relação ao momento e a intensidade das epidemias de dengue. Neste estudo, buscamos quantificar os efeitos não lineares e tardios de eventos hidrometeorológicos extremos sobre o risco de dengue ao longo de um gradiente urbano no Brasil utilizando um modelo espaço-temporal.

**Métodos:** Combinamos modelos não lineares de defasagem distribuída, com modelos espaço-temporais bayesianos para determinar a associação de exposição-defasagem-desfecho entre o risco relativo (RR) de dengue e o índice de intensidade da seca. Ajustamos o modelo a dados mensais de casos de dengue para as 558 microrregiões do Brasil entre janeiro de 2001 e dezembro de 2019, levando em consideração fatores de confusão não observados, autocorrelação espacial, sazonalidade e variabilidade interanual. Avaliamos a variação do RR ao longo de um gradiente urbano por meio de uma interação entre o índice de intensidade da seca e o grau de urbanização. Também examinamos o impacto de extremos hidrometeorológicos no risco de dengue em áreas com alta frequência de interrupção do abastecimento de água.

**Resultados:** O banco de dados contava com 12 895 293 casos de dengue notificados no Brasil entre 2001 e 2019. O RR de dengue aumentou entre 0-3 meses após condições extremamente úmidas (máximo de RR em um mês com defasagem 1.56 [95% IC 1.41–1.73]), enquanto as condições de seca aumentaram o risco três a cinco meses depois (RR máximo em quatro meses de defasagem 1.43 [1.22–1.67]). Houve um ganho no ajuste do modelo ao incluir a interação linear entre o índice de intensidade da seca e o grau de urbanização, o que mostrou um risco mais alto de dengue em áreas rurais que em áreas altamente urbanizadas durante condições extremamente úmidas (máximo de RR 1.77 [1.32–2.37] sem defasagem vs RR máximo 1.58 [1.39–1.81] com dois meses de defasagem). No entanto, o risco de dengue foi maior em áreas altamente urbanizadas após seca extrema que em áreas rurais (RR máximo 1.60 [1.33–1.92] vs 1.15 [1.08–1.22], ambos com quatro meses de defasagem). Também verificamos que o risco de dengue após uma seca extrema foi maior em áreas com maior frequência de interrupção do abastecimento de água.

**Interpretação:** Nosso estudo mostra que condições extremamente úmidas e secas podem aumentar o risco relativo de dengue com tempos de retardo diferentes. O risco associado a condições extremamente úmidas foi maior em áreas mais rurais, enquanto o risco associado a secas extremas é exacerbado em áreas altamente urbanizadas, que sofrem com a escassez de água e abastecimento intermitente de água durante as secas. Esses resultados permitem o direcionamento de atividades de controle de vetores em áreas com problemas de infraestrutura urbana, não apenas durante a estação chuvosa e quente, mas também durante os períodos de seca.

**Financiamento:** Royal Society, Medical Research Council, Wellcome Trust, National Institutes of Health, Fundação Carlos Chagas Filho de Amparo à Pesquisa do Estado do Rio de Janeiro, e Conselho Nacional de Desenvolvimento Científico e Tecnológico.
